# Supplementary material for: Comparison of the Clinical Manifestation of HPAI H5Nx in Different Poultry Types in the Netherlands, 2014–2022
Source: MDPI journal article supplement (doi:10.3390/pathogens13040280), 2024-03-26
Supplement: s1 [file s1]

## Supporting information

### Comparison of the clinical manifestation of HPAI H5Nx in different poultry types in the Netherlands, 2014-2022

Wendy J. Wolters, J.C.M. Vernooij, Thomas Spliethof, Jeanine Wiegel, Armin R.W. Elbers, Marcel A.H. Spierenburg, J. Arjan Stegeman and Francisca C. Velkers

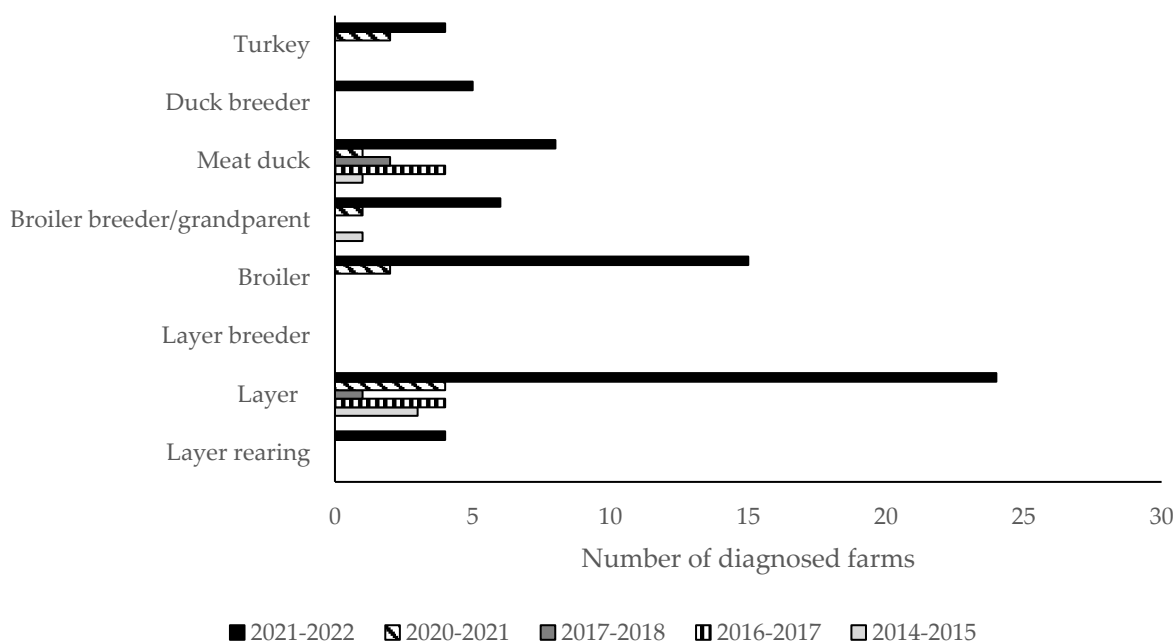

**Figure S1.** Distribution of HPAI infected farms for each outbreak season between 2014-2022.

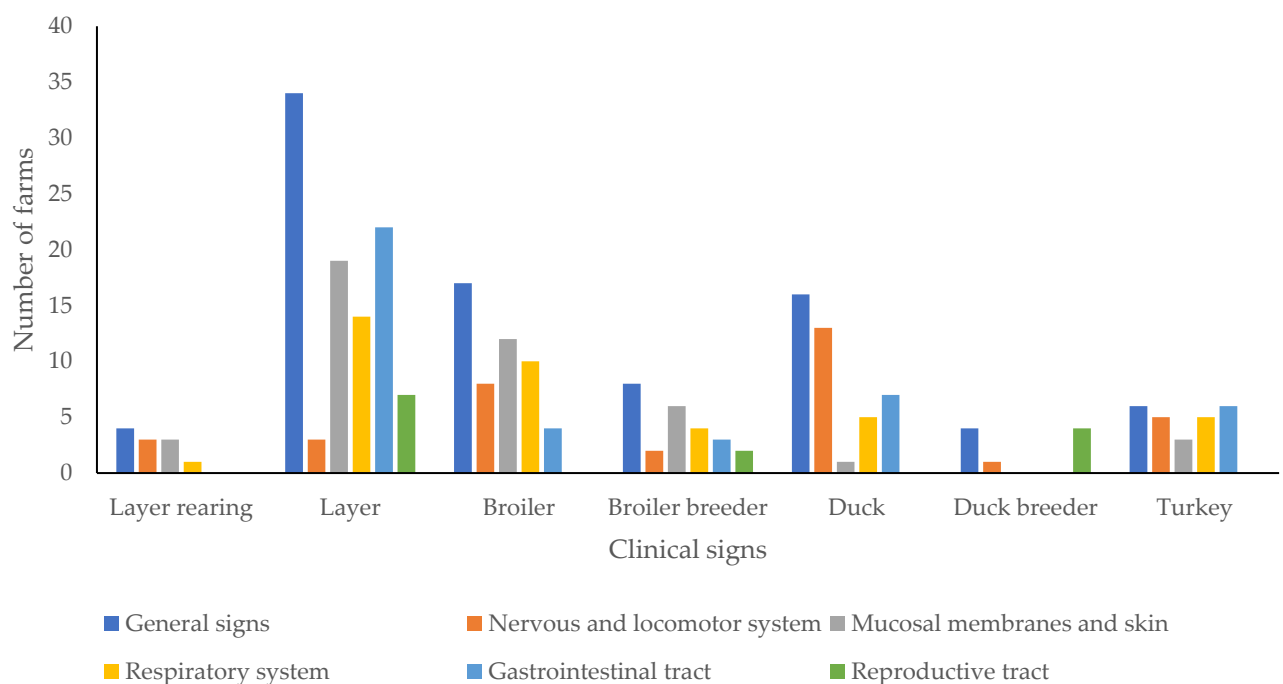

**Figure S2.** Number of HPAI infected farms between 2014-2022 with observed clinical signs categorized for different poultry types and per organ system. Clinical signs were observed by veterinarians of the NVWA and/or the Royal GD and/or the farmer scored as observed vs not observed before or right after notification.

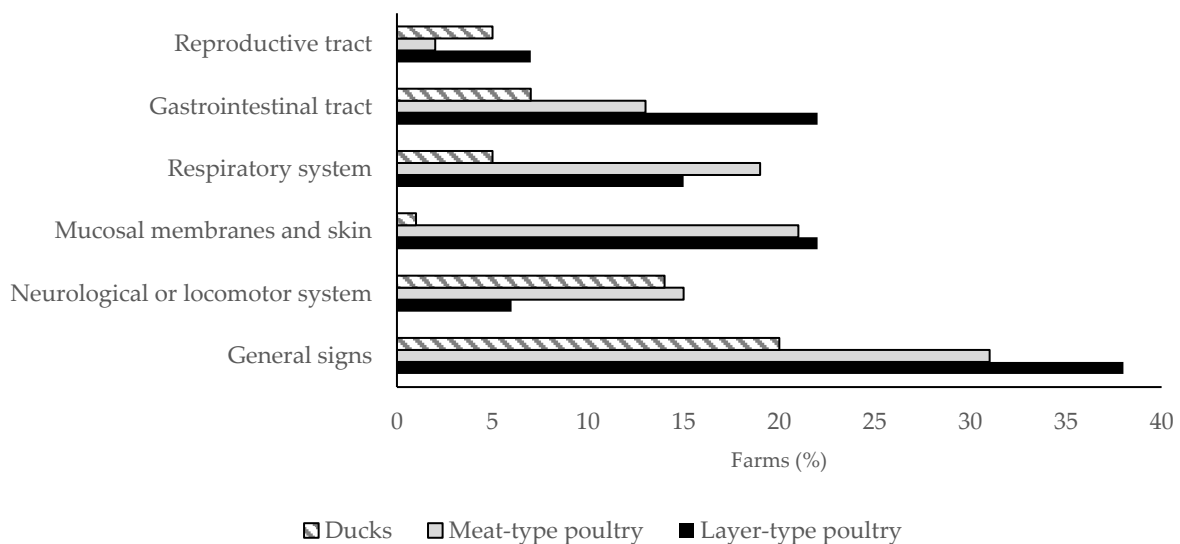

**Figure S3.** Overview of the frequency of detection of clinical signs, as categorized by organ system, observed on the day of clinical notification by the farm veterinarian, NVWA veterinarian, GD veterinarian and/or farmer on HPAI infected farms between 2014-2022. The clinical signs were scored per farm as observed or not observed. Only significant differences were found in the occurrence of signs of the mucosal membranes and skin (Fisher's exact test,  $p = 0.00$ ), signs of the nervous and locomotor system (Fisher's exact test,  $p = 0.00$ ), respiratory signs (Fisher's exact test,  $p = 0.02$ ) and signs of the reproductive tract (Fisher's exact test,  $p = 0.00$ ) between the different poultry types.

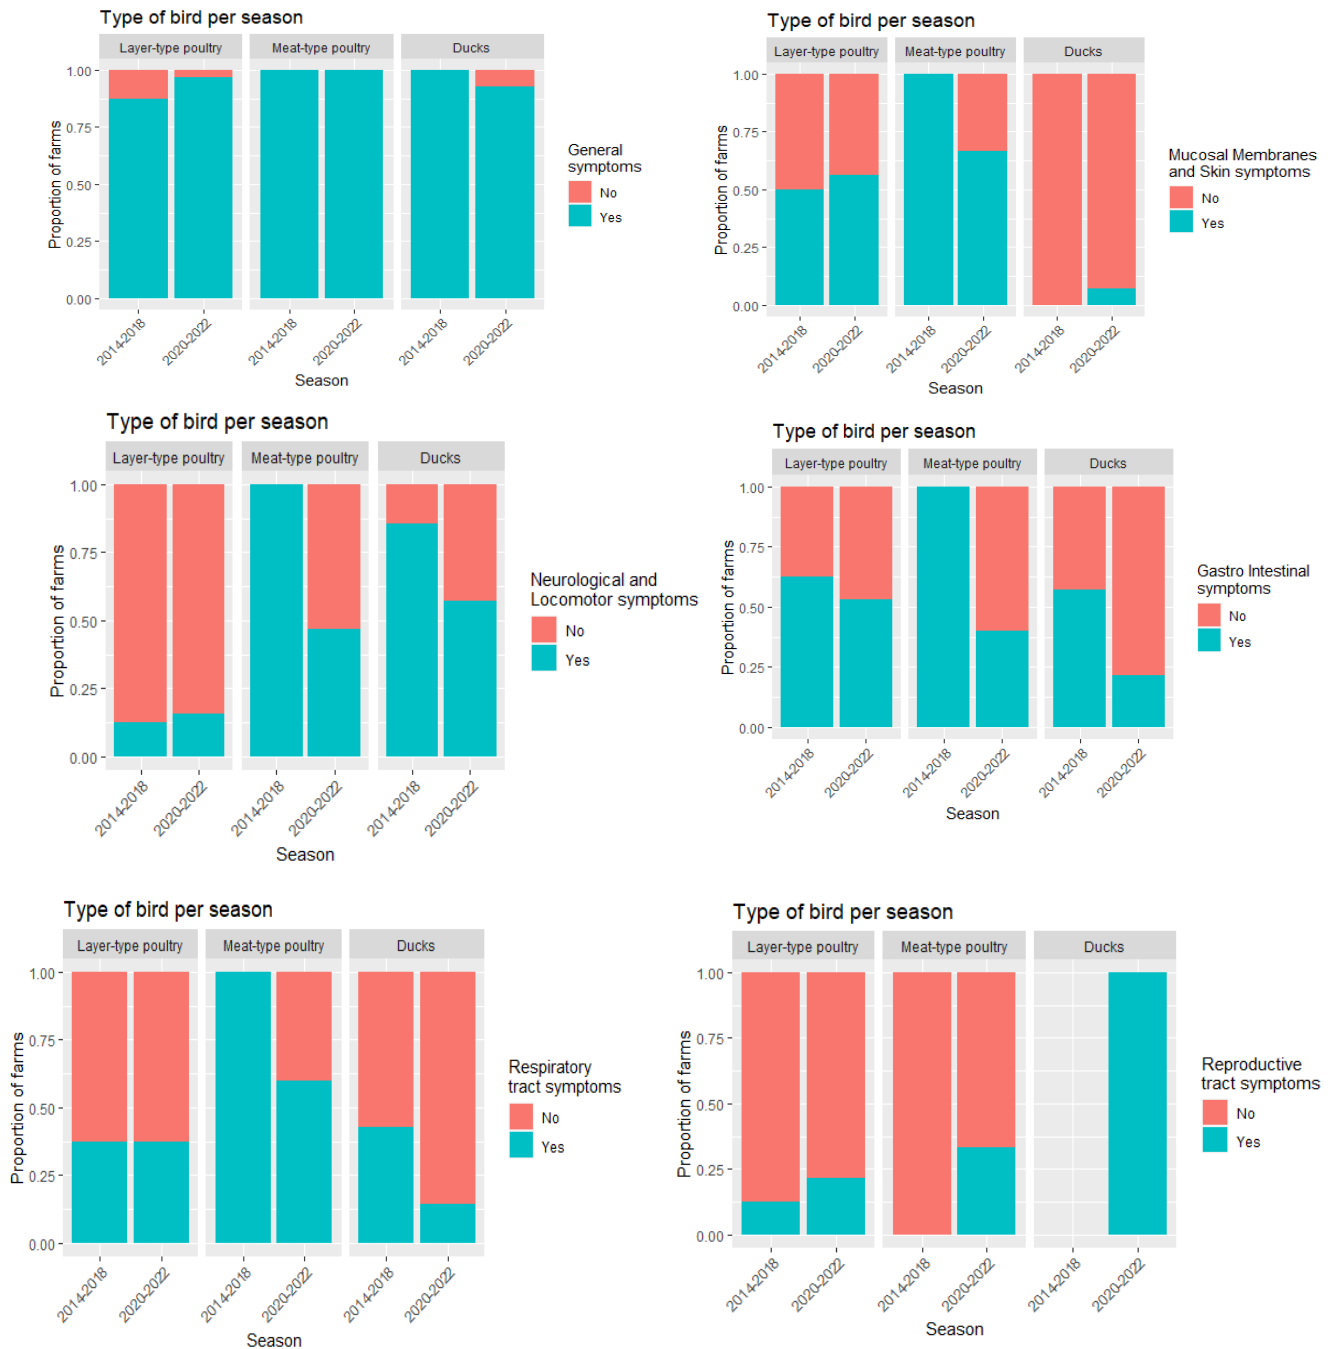

**Figure S4.** Overview of the frequency of detection of clinical signs, as categorized by organ system, in layer-type poultry, meat-type poultry and ducks observed on the day of clinical notification by the farm veterinarian, NVWA veterinarian, GD veterinarian and/or farmer on HPAI infected farms between 2014-2022. The clinical signs were scored per farm as observed (Yes) or not observed (No).

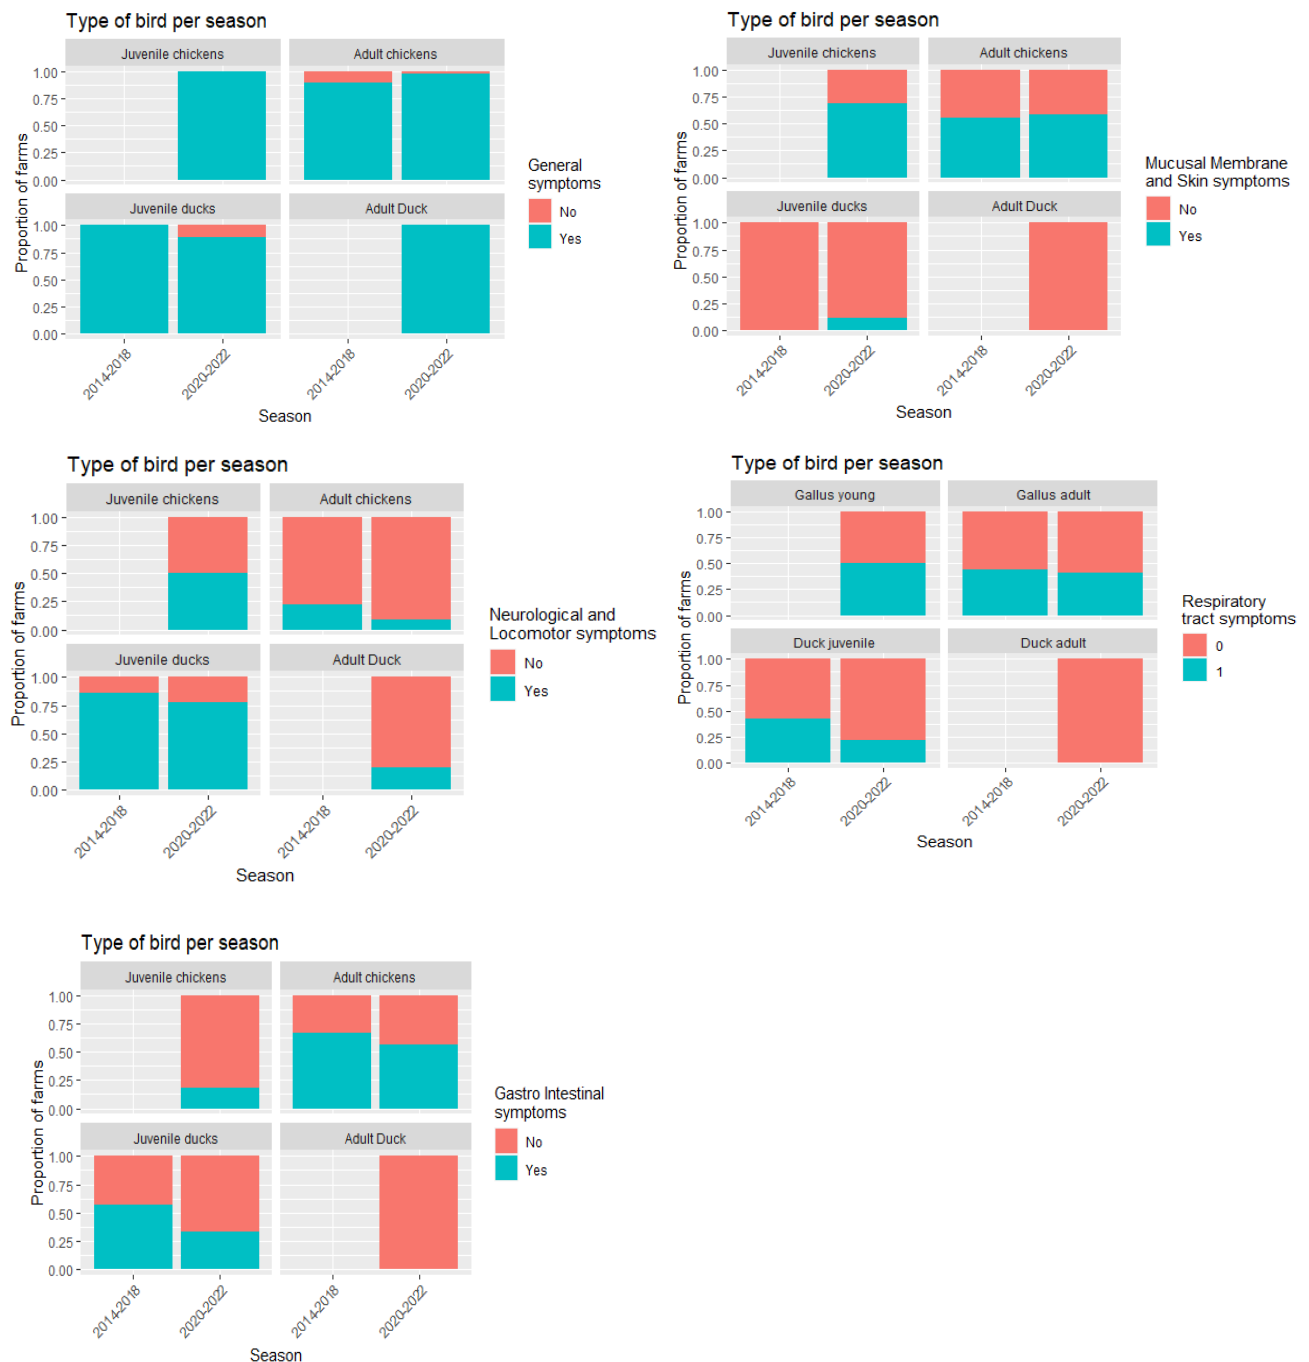

**Figure S5.** Overview of the frequency of detection of clinical signs, as categorized by organ system, in juvenile and adult chickens and ducks observed on the day of clinical notification by the farm veterinarian, NVWA veterinarian, GD veterinarian and/or farmer on HPAI infected farms between 2014-2022. The clinical signs were scored per farm as observed (Yes) or not observed (No). Signs of the reproductive tract were not included as juvenile chickens and juvenile ducks are not egg producing flocks.

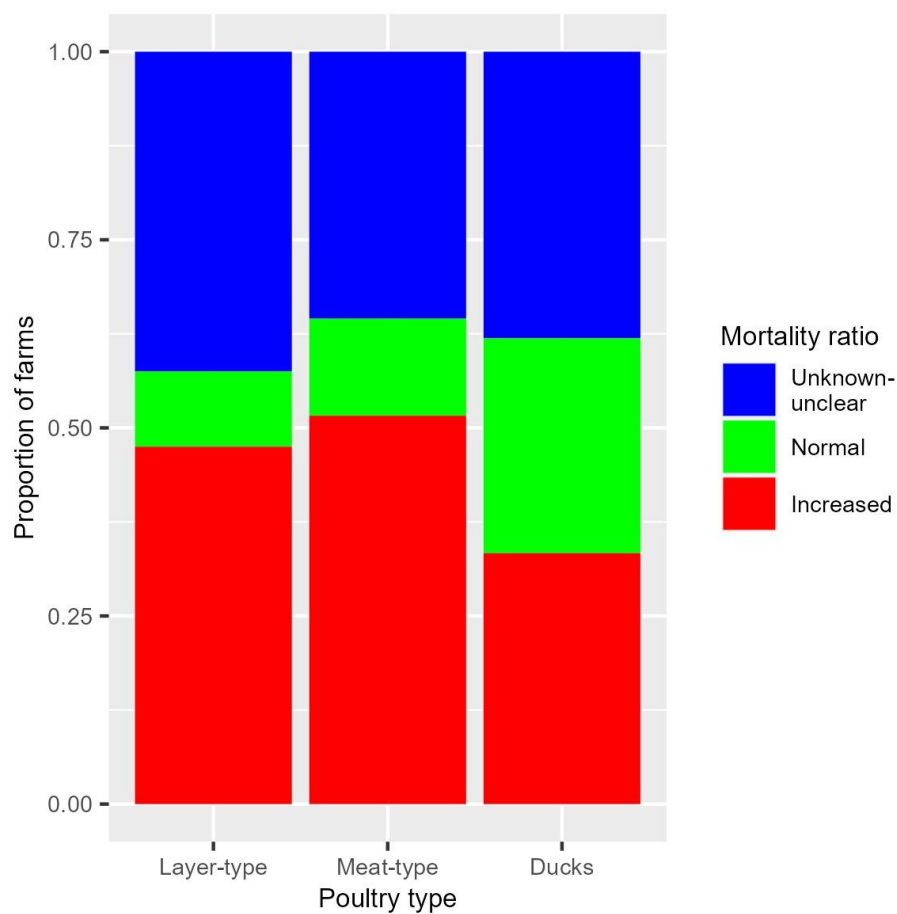

**Figure S6.** Stacked bars of the mortality ratio's as proportion of farms in layer-type poultry, meat-type poultry and ducks. Per farm the mortality ratio one day prior to notification was calculated based on production calendars and was scored whether the mortality ratio exceeded the cut off value of 3, as not increased (MR<3) or as unknown/unclear (when MR could not be calculated).

**Table S1.** List of clinical signs scored by veterinarians of the NVWA

|                                                                         |
|-------------------------------------------------------------------------|
| Anorexia                                                                |
| Sudden death / increased water intake                                   |
| Ruffled feathers / hunched posture                                      |
| Diarrhea                                                                |
| Reduced feed intake / decrease in egg production / mottled or pale eggs |
| Edema of the neck, head and eyes                                        |
| Swollen wattles, combs and extremities                                  |
| Cyanosis of the wattles, combs and extremities                          |
| Excessive lacrimation                                                   |
| Hemorrhagic conjunctiva                                                 |
| Neurological signs                                                      |
| Respiratory signs / inactivity                                          |

**Table S2.** List of clinical signs categorized per organ system

| General signs                   | Respiratory system    | Nervous and locomotor system | Mucosal membranes and skin | Gastrointestinal tract | Reproductive tract          |
|---------------------------------|-----------------------|------------------------------|----------------------------|------------------------|-----------------------------|
| Decreased activity / depression | Rales/rattles         | Tremors                      | Cyanosis of the wattles    | Diarrhea               | Decreased egg production    |
| Reduced vocalization            | Sneezing              | Paralysis                    | Hemorrhagic conjunctiva    |                        | Decreased egg-shell quality |
| Warm extremities                | Excessive lacrimation | Torticollis                  | Swollen head               |                        | Pale or mottled eggs        |
| Cold extremities                | Nasal discharge       | Opisthotonus                 | Swollen wattles            |                        |                             |
| Shivering                       | Sinusitis             | Abnormal gait                | Dark small combs           |                        |                             |
| Reduced feed intake             | Conjunctivitis        | Lameness                     | Cyanosis extremities       |                        |                             |
| Reduced water intake            | Dyspnea               | Ataxia                       |                            |                        |                             |
| Increased water intake          |                       | Inability to stand           |                            |                        |                             |
| Decreased daily growth          |                       |                              |                            |                        |                             |
| Hunched posture                 |                       |                              |                            |                        |                             |
| Ruffled feathers                |                       |                              |                            |                        |                             |
| Closed eyes                     |                       |                              |                            |                        |                             |
| Sudden death                    |                       |                              |                            |                        |                             |

Signs caused by endothelial damage were attributed to the mucosal membranes and skin such as edema of neck, eyes and head including wattles and combs, hemorrhages and cyanosis of wattles, combs and extremities. Respiratory signs included for instance dyspnea, conjunctivitis, excessive lacrimation, nasal discharge and rales/rattles. Signs of the locomotor system and nervous system were combined and included for instance tremors, paralysis, lameness, torticollis and opisthotonus. For the egg-producing farms, including breeder farms and layer farms, it was recorded whether the egg production was decreased including the presence of pale or mottled eggs and reduced egg-shell quality.

**Table S3.** Number (%) of farms infected between 2014-2022 with observed clinical categorized for different age groups and per organ system

| Clinical signs <sup>5</sup>  | Juvenile chickens <sup>1</sup> |       | Adult chickens <sup>2</sup> |      | Juvenile ducks <sup>3</sup> |      | Adult ducks <sup>4</sup> |       |
|------------------------------|--------------------------------|-------|-----------------------------|------|-----------------------------|------|--------------------------|-------|
|                              | n                              | %     | n                           | %    | n                           | %    | n                        | %     |
| General                      | 22                             | 100.0 | 41                          | 95.3 | 15                          | 93.8 | 5                        | 100.0 |
| Mucosal membranes and skin   | 15                             | 68.0  | 25                          | 58.1 | 1                           | 6.3  | 0                        | 0.0   |
| Nervous and locomotor system | 11                             | 50.0  | 5                           | 11.6 | 13                          | 81.3 | 1                        | 20.0  |
| Respiratory system           | 11                             | 50.0  | 18                          | 41.9 | 5                           | 31.3 | 0                        | 0.0   |
| Gastrointestinal tract       | 4                              | 18.2  | 25                          | 58.1 | 7                           | 43.8 | 0                        | 0.0   |

<sup>1</sup>Layer rearing, broiler; <sup>2</sup>Layers, layer breeder, broiler breeder, broiler grandparent; <sup>3</sup>Meat duck; <sup>4</sup>Duck breeder; <sup>5</sup>Clinical signs observed by veterinarians of the NVWA and/or the Royal GD and/or the farmer scored as observed vs not observed before or right after notification; <sup>5</sup> Includes only the egg producing farms (layers, layer breeder, broiler breeder, broiler grandparent and breeder duck; n = the number of farms, % = the percentage of farms. Only significant differences were found in the occurrence of signs of the mucosal membranes and skin (Fisher's exact test, p = 0.00), signs of the nervous and locomotor system (Fisher's exact test, p = 0.00), and signs of the gastrointestinal tract (Fisher's exact test, p = 0.00) between the different age groups.
